# Supplementary material
Source: PubMed Central journal article supplement (PMC3145738)
Supplement: 1109940108_pnas.201109940SI.pdf [file 1109940108_pnas.201109940SI.pdf]

# Supporting Information

Abe et al. 10.1073/pnas.1109940108

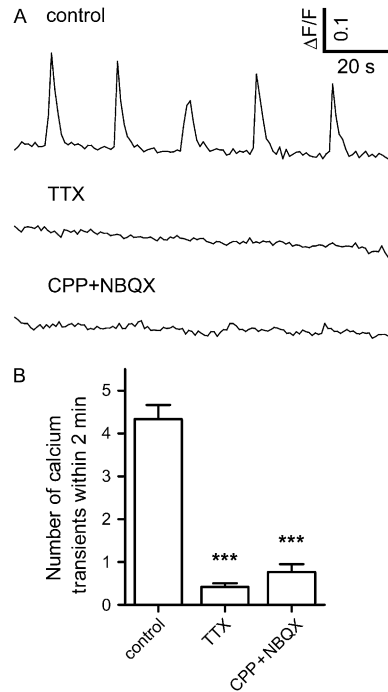

**Fig. 51.** Excitation of granule cells cultured at the physiological KCl concentration. Granule cells were cultured in medium containing serum for 24 h and then in serum-free medium for 96 h. During the last 30 min of culture, the cells were loaded with Fluo-4  $\text{Ca}^{2+}$  indicator. They then were incubated with the fresh medium in a micro  $\text{CO}_2$  incubator (Tokai Hit) mounted on a stage of an Olympus BX51WI upright fluorescence microscope equipped with an EM-CCD camera (Andor).  $\text{Ca}^{2+}$  transients were measured by recording fluorescent changes at 510 nm by excitation at 488 nm and were analyzed by using MetaMorph software (Molecular Devices). Frequencies of  $\text{Ca}^{2+}$  transients were calculated by counting  $\text{Ca}^{2+}$  transients that exceeded 3% in changes of fluorescence intensity ( $\Delta F$ ) relative to that of the baseline fluorescence ( $F$ ). Representative traces (A) and frequencies (B) of  $\text{Ca}^{2+}$  transients under the different culture condition ( $n > 100$  cells) are indicated. \*\*\*  $P < 0.001$  vs. control. CPP, 3-(2-carboxypiperazin-4-yl)-propyl-1-phosphonic acid; NBQX, 2, 3-dioxo-6-nitro-1, 2, 3, 4-tetrahydrobenzo [f] quinoxaline-7-sulfonamide; TTX, tetrodotoxin.

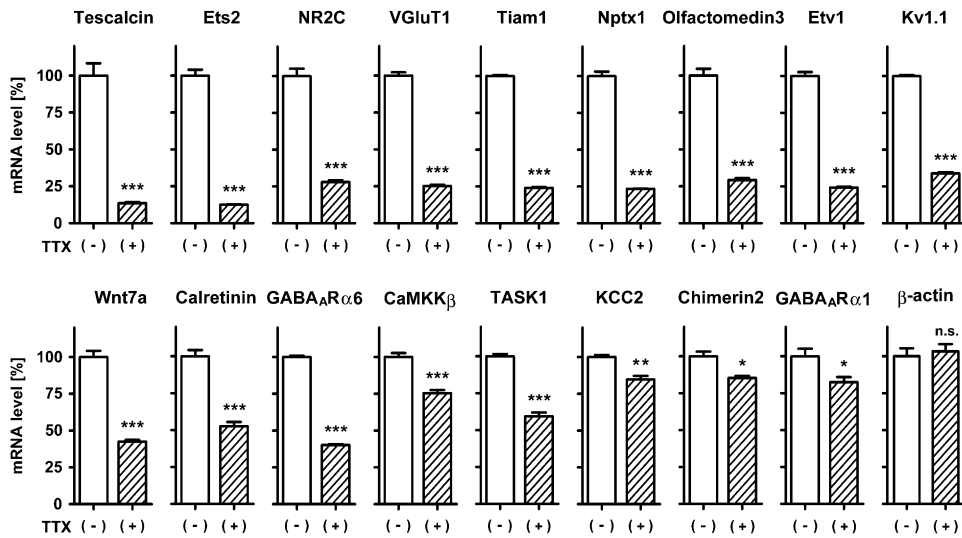

**Fig. 52.** Inhibition of 17 maturation genes by TTX. Granule cells were cultured in medium containing serum for 24 h and then in serum-free medium in the presence or absence of TTX (5  $\mu$ M) for 96 h, and mRNA levels were quantified by PCR. Experiments were performed in triplicate.  $\beta$ -actin mRNA was quantified as an activity-insensitive control mRNA. Data are expressed as percentages of mRNA levels in TTX-treated cells relative to those in untreated cells (100%) and are shown as mean  $\pm$  SEM. \* $P$  < 0.05; \*\* $P$  < 0.01; \*\*\* $P$  < 0.001 vs. untreated. n.s., not significant. Ets2, E26 avian leukemia oncogene 2; NR2C, NMDA glutamate receptor subunit 2C; VGluT1, vesicular glutamate transporter 1; Tiam1, T-cell lymphoma invasion and metastasis 1; Nptx1, neuronal pentraxin 1; Etv1, Ets variant gene 1; Kv1.1, voltage-gated potassium channel, shaker-related subfamily, member 1; Wnt7a, wingless-related MMTV integration site 7A; GABA<sub>A</sub>α6, GABA<sub>A</sub> receptor  $\alpha$ 6; CaMKK $\beta$ , calcium/calmodulin-dependent protein kinase kinase  $\beta$ ; TASK1, TWIK-related acid-sensitive potassium channel 1; KCC2, potassium-chloride cotransporter 2; GABA<sub>A</sub>α1, GABA<sub>A</sub> receptor  $\alpha$ 1.

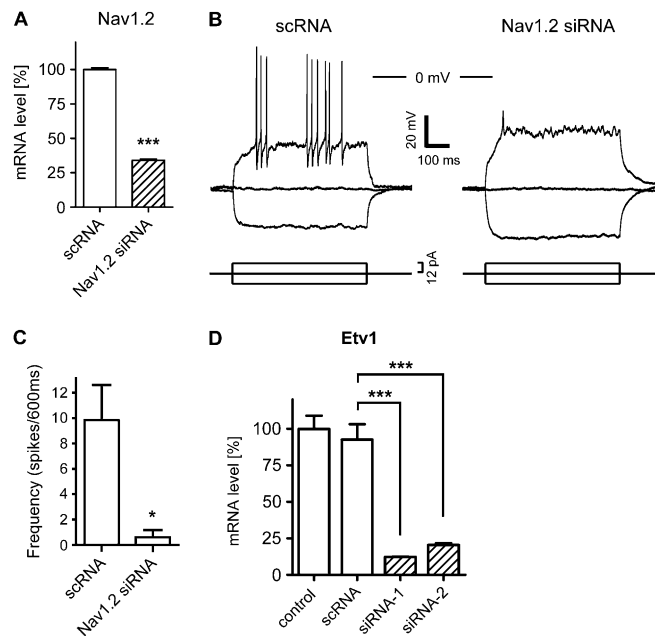

**Fig. 53.** Knockdown of voltage-gated sodium channel type II (*Nav1.2*) mRNA and *Ets* variant gene 1 (*Etv1*) mRNA by siRNA treatments and blockade of action potential by *Nav1.2* siRNA. (A) *Nav1.2* siRNA or scrambled siRNA (scRNA) (6  $\mu$ g each) was electroporated into dissociated granule cells, which then were cultured in medium containing serum for 24 h and in serum-free medium for 96 h. Experiments were performed in triplicate, and mRNA levels were quantified by PCR. Statistical analysis was performed, and data are presented as in Fig. 51. (B and C) Patch-clamp recordings were performed in granule cells cultured as in A for 96–120 h, and action potentials were measured by current injection for 600 ms at the holding potential of  $-70$  mV. Representative voltage traces following current injection of +12 pA,  $-12$  pA, or no injection (B) and frequencies of action potentials at +12 pA (C) are indicated ( $n = 12$  for scRNA;  $n = 6$  for *Nav1.2* siRNA). (D) *Etv1* siRNA-1, *Etv1* siRNA-2, or scRNA (6  $\mu$ g each) was electroporated into dissociated granule cells, and culture was conducted as in A ( $n = 3$ ). *Etv1* mRNA levels were quantified by PCR. Data are shown as mean  $\pm$  SEM. \* $P$  < 0.05; \*\*\* $P$  < 0.001 vs. scRNA.

**Table S1. Microarray analysis of TTX-suppressive genes in cultured granule cells**

|   | National Center for<br>Biotechnology<br>Information gene ID# | Gene name                  | Function                | Hybridization signals |        | Fold reduction |
|---|--------------------------------------------------------------|----------------------------|-------------------------|-----------------------|--------|----------------|
|   |                                                              |                            |                         | Control (- TTX)       | + TTX  |                |
| ● | 57816                                                        | Tescalcin                  | Intracellular signaling | 984.1                 | 141.4  | 7.0            |
| ● | 23872                                                        | <i>Ets2</i>                | Transcription factor    | 735.4                 | 133.8  | 5.5            |
| ○ | 14813                                                        | <i>NR2C</i>                | Receptor                | 76.4                  | 14.3   | 5.3            |
| ● | 72961                                                        | <i>VGluT1</i>              | Transporter             | 1016.1                | 215.4  | 4.7            |
| ○ | 21844                                                        | <i>Tiam1</i>               | Intracellular signaling | 482.0                 | 102.5  | 4.7            |
| ○ | 18164                                                        | <i>Nptx1</i>               | Extracellular signaling | 1946.7                | 472.8  | 4.1            |
| ○ | 229759                                                       | Olfactomedin3              | Extracellular signaling | 1439.8                | 362.4  | 4.0            |
| ○ | 14009                                                        | <i>Etv1</i>                | Transcription factor    | 2886.3                | 777.6  | 3.7            |
|   | 20564                                                        | <i>Slit3</i>               | Extracellular signaling | 20.5                  | 6.1    | 3.3            |
| ○ | 16485                                                        | <i>Kv1.1</i>               | Ion channel             | 1488.5                | 529.8  | 2.8            |
| ○ | 22421                                                        | <i>Wnt7a</i>               | Extracellular signaling | 855.4                 | 373.3  | 2.3            |
| ○ | 12308                                                        | Calretinin                 | Intracellular signaling | 1097.8                | 493.1  | 2.2            |
|   | 14403                                                        | <i>GABA<sub>A</sub>Rδ</i>  | Receptor                | 732.9                 | 348.6  | 2.1            |
|   | 69601                                                        | <i>Dab2ip</i>              | Intracellular signaling | 732.3                 | 372.1  | 2.0            |
| ○ | 14399                                                        | <i>GABA<sub>A</sub>Rα6</i> | Receptor                | 5850.2                | 3006.7 | 1.9            |
| ○ | 207565                                                       | <i>CaMKKβ</i>              | Kinase                  | 1179.1                | 720.9  | 1.6            |
|   | 64297                                                        | <i>Gprc5b</i>              | Receptor                | 170.0                 | 108.9  | 1.6            |
| ○ | 16527                                                        | <i>TASK1</i>               | Ion channel             | 253.8                 | 172.4  | 1.5            |
|   | 105445                                                       | <i>Dock9</i>               | Intracellular signaling | 633.3                 | 442.6  | 1.4            |
|   | 226251                                                       | <i>Ablim1</i>              | Intracellular signaling | 392.3                 | 290.4  | 1.4            |
| ○ | 57138                                                        | <i>KCC2</i>                | Transporter             | 2778.3                | 2129.8 | 1.3            |
| ○ | 69993                                                        | Chimerin2                  | Intracellular signaling | 3483.3                | 2687.9 | 1.3            |
| ○ | 14394                                                        | <i>GABA<sub>A</sub>Rα1</i> | Receptor                | 3007.1                | 2607.0 | 1.2            |
|   | 20745                                                        | Testican                   | Extracellular signaling | 694.8                 | 780.7  | -0.9           |

Microarray analysis was performed twice with RNA samples prepared from different cultures, and the data were averaged. Three genes identified as TTX-suppressive genes in this study are marked by black circles. The other 21 genes were reported previously as developmentally up-regulated genes (1), and all but the *testican* gene were found to be TTX suppressive. The 17 genes indicated by black or white circles were selected for detailed analysis. *Slit3*, slit homolog 3; *GABA<sub>A</sub>Rδ*, *GABA<sub>A</sub>* receptor  $\delta$ ; *Dab2ip*, *Dab2* interacting protein; *Gprc5b*, G protein-coupled receptor, family C, group 5, member B; *Dock9*, dedicator of cytokinesis 9; *Ablim1*, actin-binding LIM protein 1.

1. Sato M, Suzuki K, Yamazaki H, Nakanishi S (2005) A pivotal role of calcineurin signaling in development and maturation of postnatal cerebellar granule cells. *Proc Natl Acad Sci USA* 102:5874–5879.
